# Supplementary material for: Clustering of Multiple Energy Balance-Related Behaviors in School Children and its Association with Overweight and Obesity—WHO European Childhood Obesity Surveillance Initiative (COSI 2015–2017)
Source: PubMed Central journal article supplement (PMC6471416; doi:10.3390/nu11030511), 2019-02-27
Supplement: nutrients-11-00511-s001.pdf [file nutrients-11-00511-s001.pdf]

Article

# Clustering of Multiple Energy Balance-Related Behaviors in School Children and its Association with Overweight and Obesity – WHO European Childhood Obesity Surveillance Initiative (COSI 2015-2017)

## Supplementary Materials

**Table S1.** Main characteristics of study design within each country participating in the fourth round of the WHO Europe Childhood Obesity Surveillance Initiative (2015/2017).

| Country        | Sampling strategy                | Target age group | Sample size | Response rates |                      |
|----------------|----------------------------------|------------------|-------------|----------------|----------------------|
|                |                                  |                  |             | Anthropometry  | Family questionnaire |
| Albania        | Two-stage cluster sampling       | 8                | 2,072       | 92%            | 36%                  |
| Bulgaria       | Three-stage cluster sampling     | 7                | 3,265       | 84%            | n/a                  |
| Croatia        | One-stage cluster sampling       | 8                | 2,501       | 79%            | 77%                  |
| Czech Republic | Two-stage cluster sampling       | 7                | 1,303       | n/a            | n/a                  |
| Denmark        | One-stage cluster sampling       | 7                | 901         | 85%            | 30%                  |
| Georgia        | Two-stage cluster sampling       | 7                | 2,852       | 81%            | 78%                  |
| Ireland        | Two-stage cluster sampling       | 7                | 857         | 61%            | 32%                  |
| Kazakhstan     | Two-stage cluster sampling       | 9                | 3,435       | 93%            | 82%                  |
| Latvia         | One-stage cluster sampling       | 7                | 5,529       | 80%            | n/a                  |
| Lithuania      | Two-stage cluster sampling       | 7                | 3,473       | n/a            | n/a                  |
| Malta          | Entire target age group included | 7                | 2,868       | 92%            | 73%                  |
| Montenegro     | Two-stage cluster sampling       | 7                | 2,487       | 84%            | 67%                  |
| Poland         | Four-stage cluster sampling      | 8                | 2,755       | 89%            | 77%                  |
| Portugal       | Two-stage cluster sampling       | 7                | 5,813       | 92%            | 86%                  |
| Romania        | Two-stage cluster sampling       | 8, 9             | 5,677       | 84%            | 74%                  |
| Russia         | Two-stage cluster sampling       | 7                | 1,432       | 78%            | 53%                  |
| Spain          | Two-stage cluster sampling       | 6, 7, 8, 9       | 10,410      | 73%            | 70%                  |
| Tajikistan     | Two-stage cluster sampling       | 7                | 2,538       | 95%            | 93%                  |

|                     |                            |   |       |     |     |
|---------------------|----------------------------|---|-------|-----|-----|
| <b>Turkmenistan</b> | Two-stage cluster sampling | 7 | 3,047 | 97% | 95% |
|---------------------|----------------------------|---|-------|-----|-----|

n/a, not available.

**Table 2.** Measuring equipment used within each country participating in the fourth round of the WHO Europe Childhood Obesity Surveillance Initiative (2015/2017).

| <b>Country</b>        | <b>Scale</b>        | <b>Stadiometer</b>                |
|-----------------------|---------------------|-----------------------------------|
| <b>Albania</b>        | Seca 813            | Seca 213                          |
| <b>Bulgaria</b>       | Tanita UM-072       | Portable Leicester Height Measure |
| <b>Croatia</b>        | Seca 877            | Seca 217                          |
| <b>Czech Republic</b> | Seca 872            | Seca 206 Bodymeter Measuring Tape |
| <b>Denmark</b>        | Seca 877            | Seca 217                          |
| <b>Georgia</b>        | Tanita WB-100 MA    | Portable Leicester Height Measure |
| <b>Ireland</b>        | Tanita WB-100 MA    | Portable Leicester Height Measure |
| <b>Kazakhstan</b>     | Seca 813            | Seca 213                          |
| <b>Latvia</b>         | n/a                 | n/a                               |
| <b>Lithuania</b>      | Seca 862 & Seca 872 | Seca 214                          |
| <b>Malta</b>          | Beurer GS490        | Seca 214                          |
| <b>Montenegro</b>     | Seca 799            | Seca 220                          |
| <b>Poland</b>         | Seca 878            | Seca 217                          |
| <b>Portugal</b>       | Seca 803            | Seca 214                          |
| <b>Romania</b>        | Beurer PS07         | Seca 206 Bodymeter Measuring Tape |
| <b>Russia</b>         | n/a                 | n/a                               |
| <b>Spain</b>          | Tanita UM-076       | Tanita Tantoise                   |
| <b>Tajikistan</b>     | n/a                 | n/a                               |
| <b>Turkmenistan</b>   | Seca 769            | Seca 220                          |

n/a, not available.

**Table 3.** Questions on energy balance-related behaviors asked through the family survey questionnaire in the fourth round of the WHO Europe Childhood Obesity Surveillance Initiative (2015/2017).

| <b>Energy balance-related behaviour</b> | <b>Question</b>                                                                                                                                                                                                                                                                                | <b>Response categories</b>                                                                                                                                                                                                                                             |
|-----------------------------------------|------------------------------------------------------------------------------------------------------------------------------------------------------------------------------------------------------------------------------------------------------------------------------------------------|------------------------------------------------------------------------------------------------------------------------------------------------------------------------------------------------------------------------------------------------------------------------|
| <i>Physical activity</i>                | In his/her free time, about how many hours per day is your child usually playing actively/vigorously (e.g. running, jumping outside or moving and fitness games inside)?                                                                                                                       | Never at all<br>Less than 1 hour per day<br>About 1 hour per day<br>About 2 hours per day<br>About 3 or more hours per day<br><br>Data collected separately for week days and weekend days                                                                             |
| <i>Sedentary behavior</i>               | Outside school lessons, how much time does your child usually spend watching TV or using electronic devices such as computer, tablet, smartphone or other electronic device (not including moving or fitness games), either at home or outside home (e.g. Internet cafes, game centres, etc.)? | Not at all<br>Hours/day (all countries)<br><br>Never<br>Less than 1 hour per day<br>About 1 hour per day<br>About 2 hours per day<br>About 3 or more hours per day (Ireland, Lithuania and Spain only)<br><br>Data collected separately for week days and weekend days |
| <i>Dietary intake</i>                   | Over a typical or usual week, how often does your child eat or drink the following kinds of foods or beverages?                                                                                                                                                                                | Never<br>Less than once a week<br>Some days (1-3 days)                                                                                                                                                                                                                 |

---

|                                 |                      |
|---------------------------------|----------------------|
| Fresh fruit                     | Most days (4-6 days) |
| Vegetables (excluding potatoes) | Every day            |
| Soft drinks containing sugar    |                      |

---
